# Supplementary material
Source: Springer Nature journal article supplement (https://www.springermedizin.de/resource/supplementary/12913_2013_3007_MOESM3_ESM.pdf/9533332)
Supplement: MOESM3 [file 9533332]

Number of programs per million  
overweight/obese people

▣ Non-surgical programs

■ Surgical programs

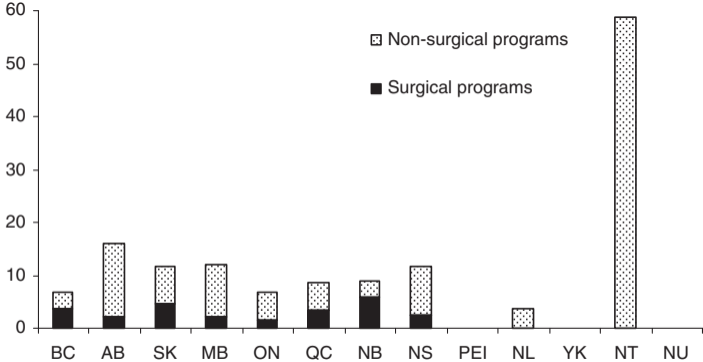

Provinces and Territories
